# Supplementary material for: A novel synthesis of β-lactam fused cyclic enediynes by intramolecular Kinugasa reaction
Source: Royal Society of Chemistry journal article supplement (doi:10.1039/b605743h), 2006-01-01
Supplement: b605743h.pdf [file b605743h.pdf]

## Supporting Information

### A Novel Synthesis of $\beta$ -Lactam Fused Cyclic Enediynes By Intramolecular Kinugasa Reaction\*\*

Runa Pal and Amit Basak\*

Bioorganic Laboratory, Department of Chemistry, Indian Institute of Technology,  
Kharagpur, India.

Fax: 91 3222 282252; Tel: 91 3222 283300;

E-mail: absk@chem.iitkgp.ernet.in

**Page No. 2: Figures S1 and S2:**  $^1\text{H}$  and  $^{13}\text{C}$  NMR spectra of compound **9A**

**Page No. 3: Figures S3 and S4:**  $^1\text{H}$  and  $^{13}\text{C}$  NMR spectra of compound **10**

**Page No. 4: Figures S5 and S6:**  $^1\text{H}$  and  $^{13}\text{C}$  NMR spectra of compound **11**

**Page No. 5: Figures S7 and S8:**  $^1\text{H}$  and  $^{13}\text{C}$  NMR spectra of compound **12**

**Page No. 6: Figures S9 and S10:**  $^1\text{H}$  and  $^{13}\text{C}$  NMR spectra of compound **13A**

**Page No. 7: Figures S11 and S12:**  $^1\text{H}$  and  $^{13}\text{C}$  NMR spectra of compound **14**

**Page No. 8: Figures S13 and S14:**  $^1\text{H}$  and  $^{13}\text{C}$  NMR spectra of compound **15**

**Page No. 9: Figure S15 and S16:**  $^1\text{H}$  spectra of compound **16 & 23**.

**Page No. 10: Figure S17 and S18:**  $^1\text{H}$  and  $^{13}\text{C}$  NMR spectra of compound **27**.

**Page No. 11: Figure S19 and S20:**  $^1\text{H}$  and  $^{13}\text{C}$  NMR spectra of compound **28**.

**Page No. 12: Figure S21 and S22:**  $^1\text{H}$  spectra of compound **29 & 30**

**Page No. 13: Figure S23 and S24:**  $^1\text{H}$  and  $^{13}\text{C}$  NMR spectra of compound **6**.

**Page No. 14: Figure S25 and S26:**  $^1\text{H}$  and  $^{13}\text{C}$  NMR spectra of compound **1**.

**Page No. 15: Figure S27 and S28:**  $^1\text{H}$  and  $^{13}\text{C}$  NMR spectra of compound **2**.

**Page No. 16: Figure S29 and S30:**  $^1\text{H}$  spectra of compound **4 & 3**.

**Page No. 17: Figure S31 to S34:** Decoupling spectra of **1, 2, 5 & 6**.

**Page No. 18: Figure S35:**  $^{13}\text{C}$  spectra of compound **5 & additional spectral data (2& 4)**

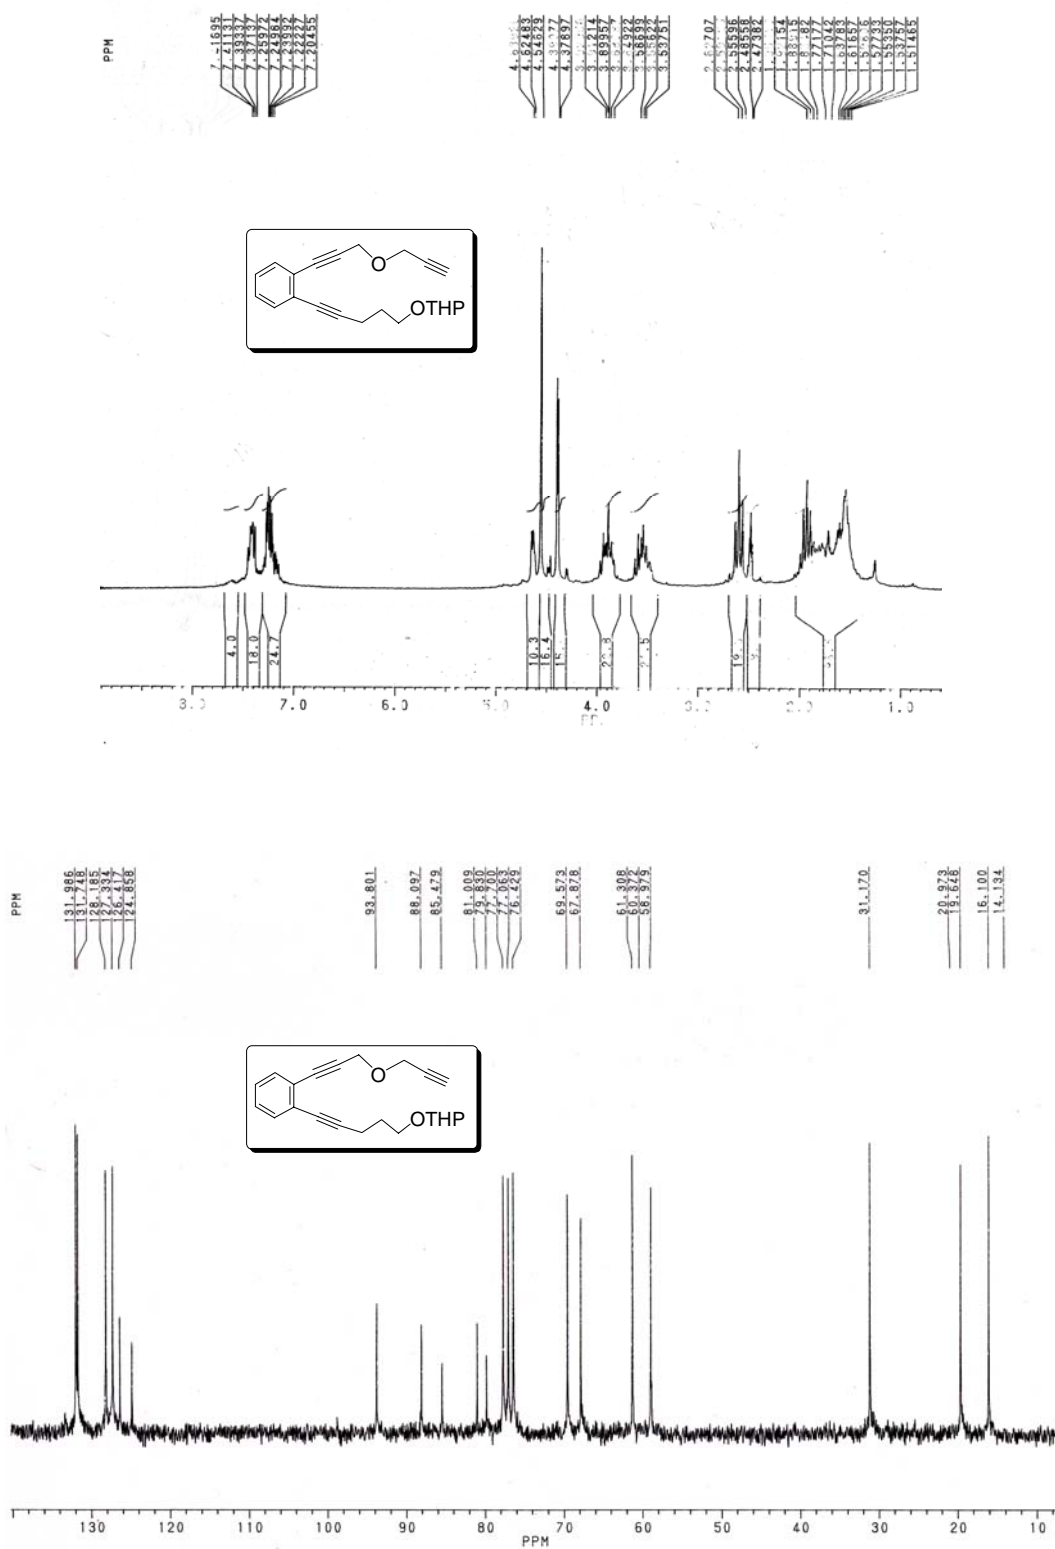

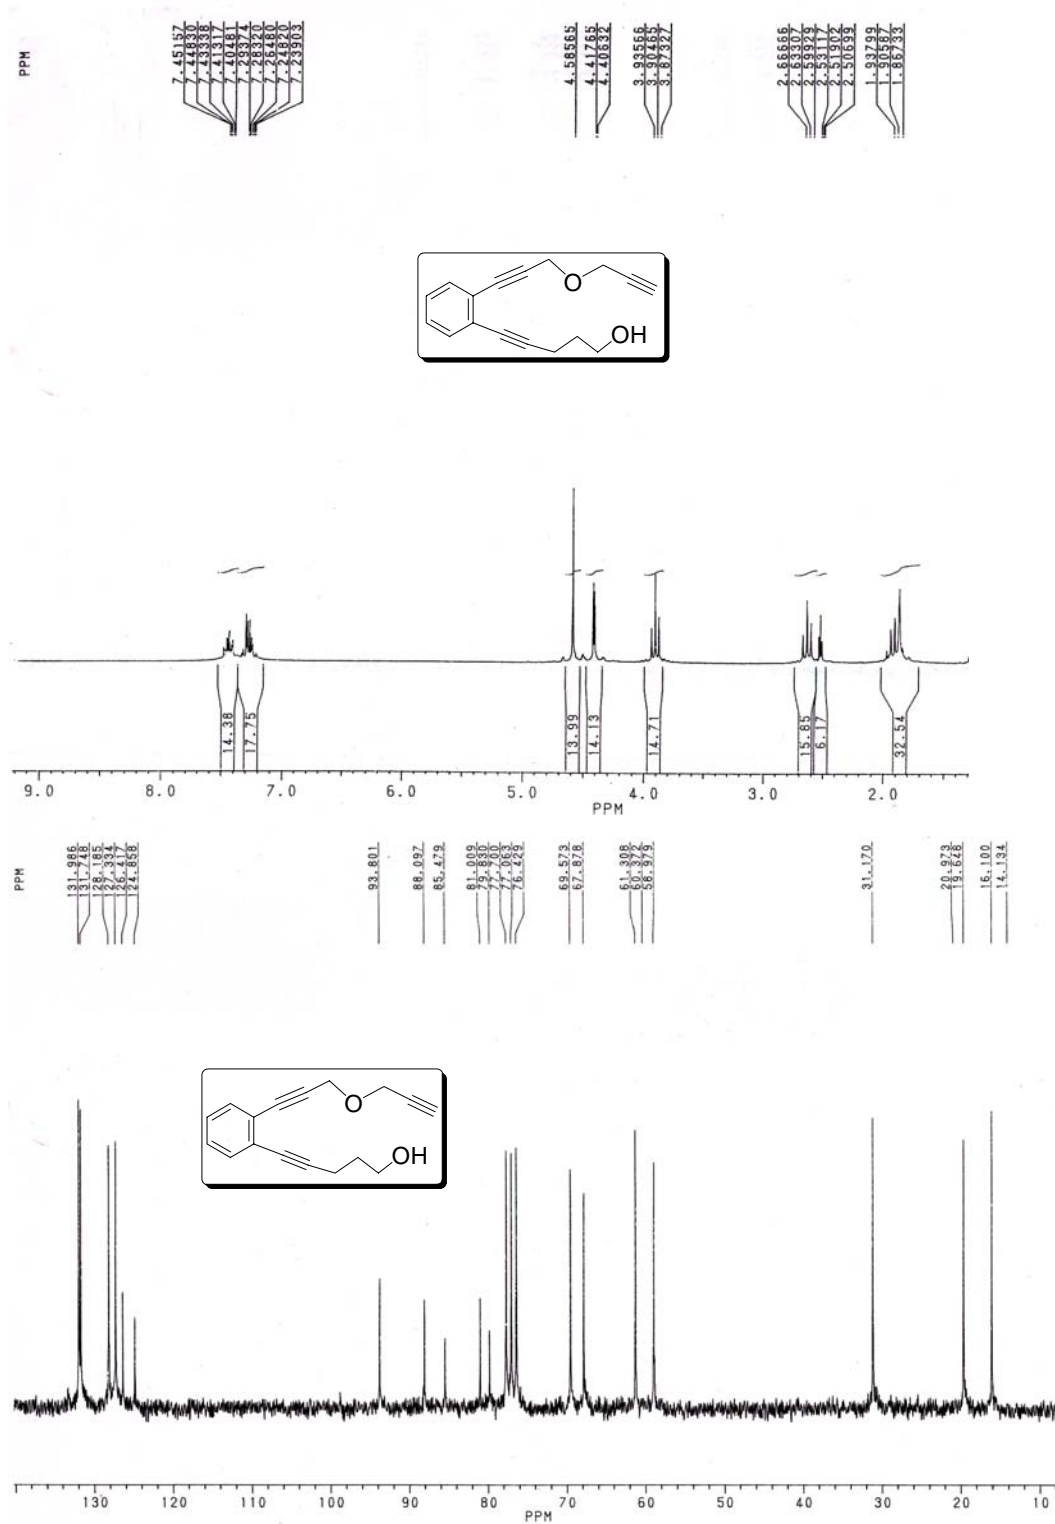

Figure S3 & S4: <sup>1</sup>H & <sup>13</sup>C NMR Spectrum of compound 10 in CDCl<sub>3</sub>

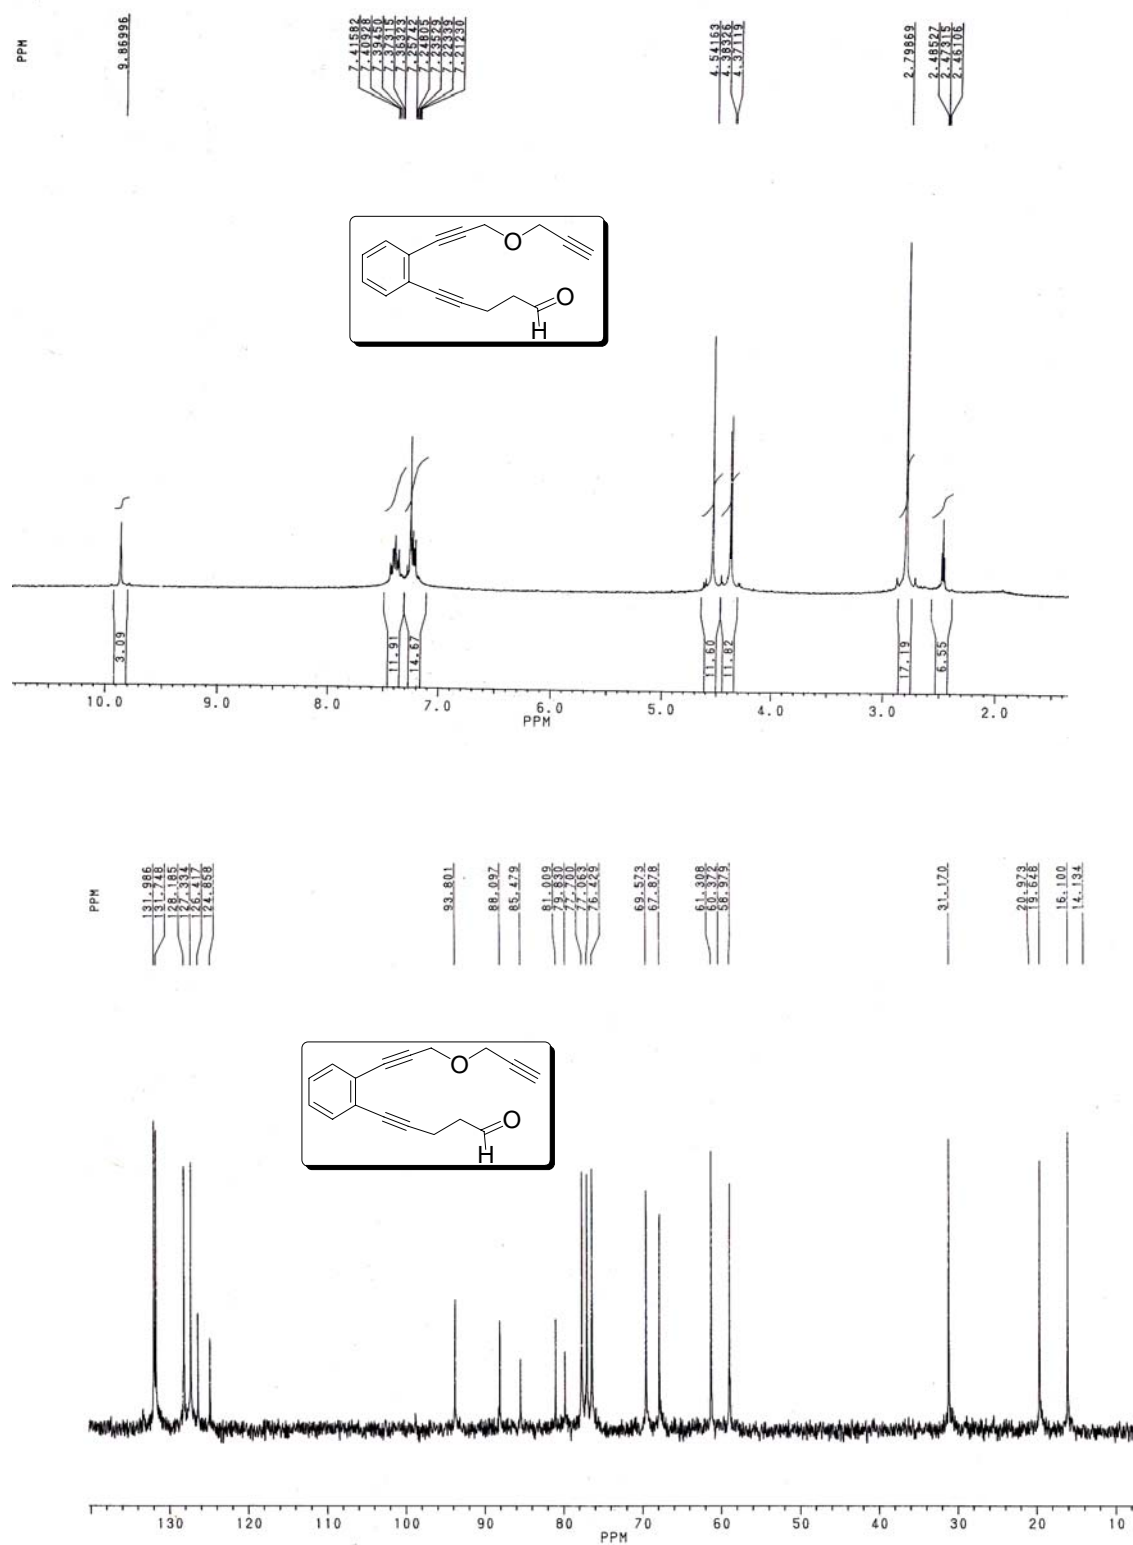

Figure S5 & S6: <sup>1</sup>H & <sup>13</sup>C NMR Spectrum of compound 11 in CDCl<sub>3</sub>













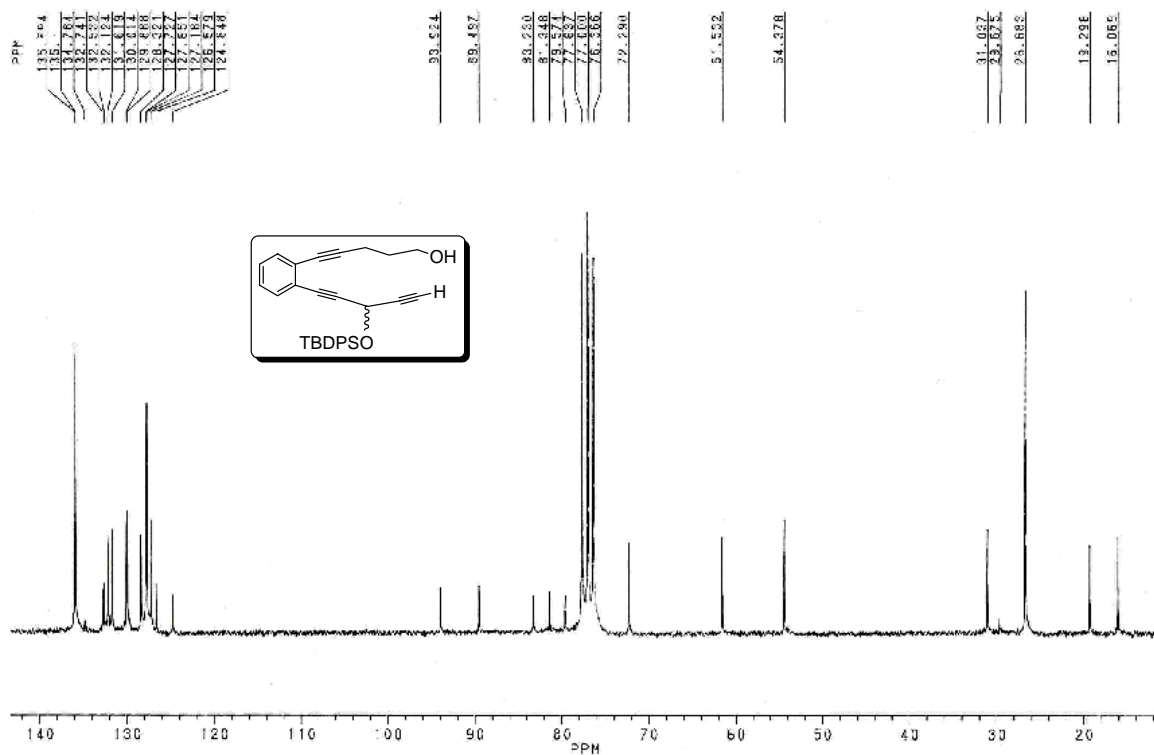

**Figure S17 & S18:  $^1\text{H}$  &  $^{13}\text{C}$  NMR Spectrum of compound 27 in  $\text{CDCl}_3$**

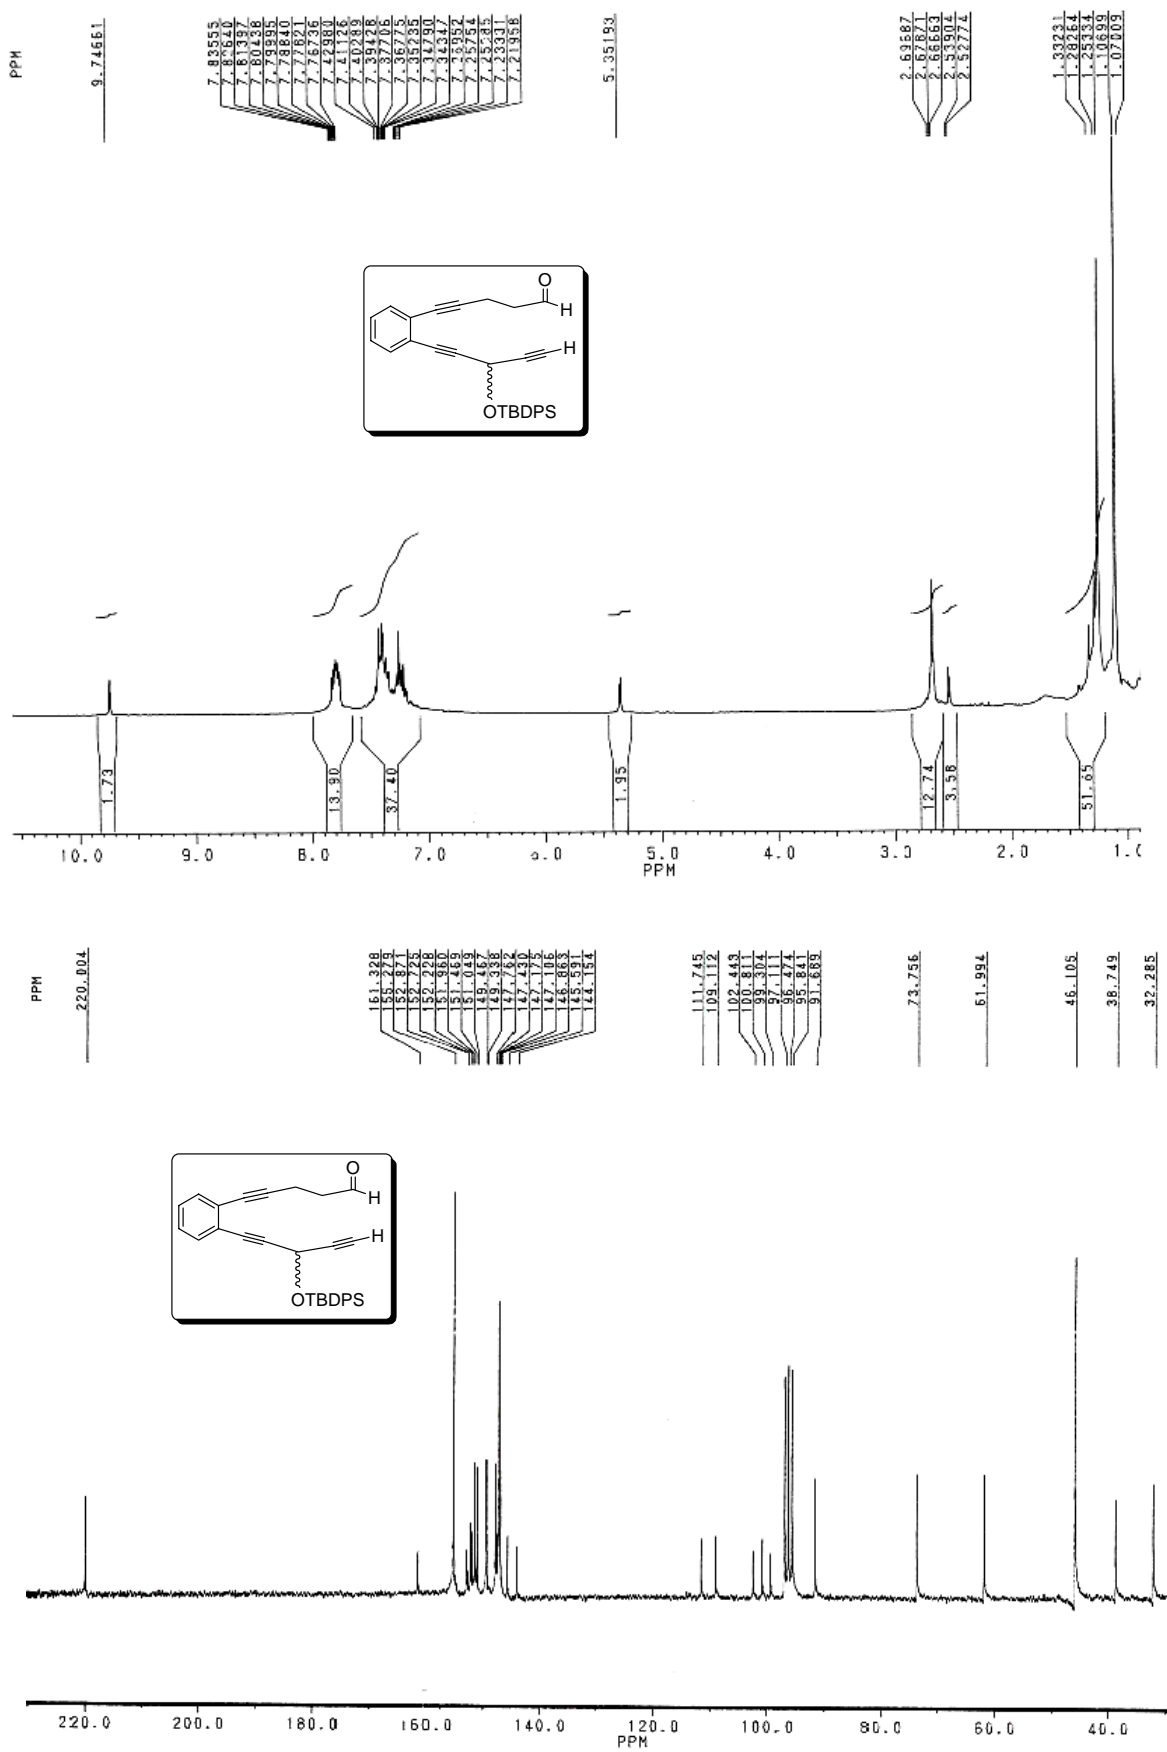

Figure S19 & S20: <sup>1</sup>H & <sup>13</sup>C NMR Spectrum of compound 28 in CDCl<sub>3</sub>





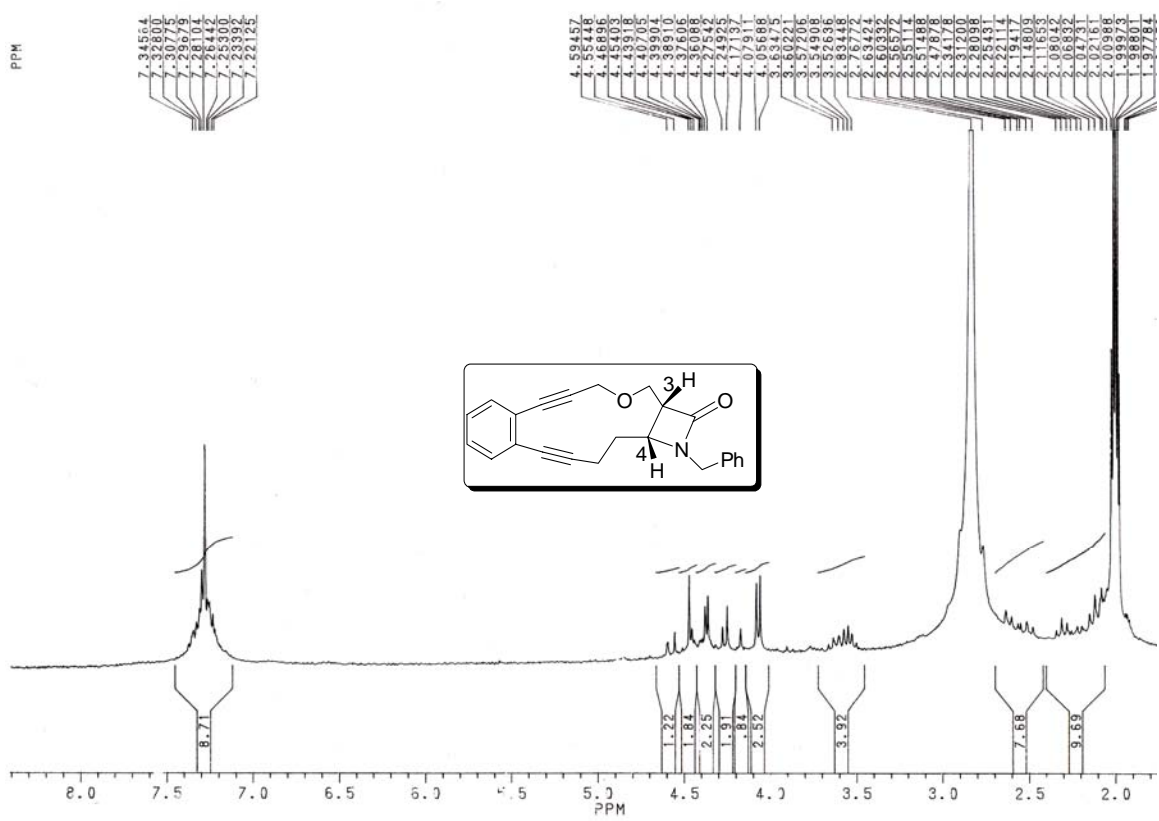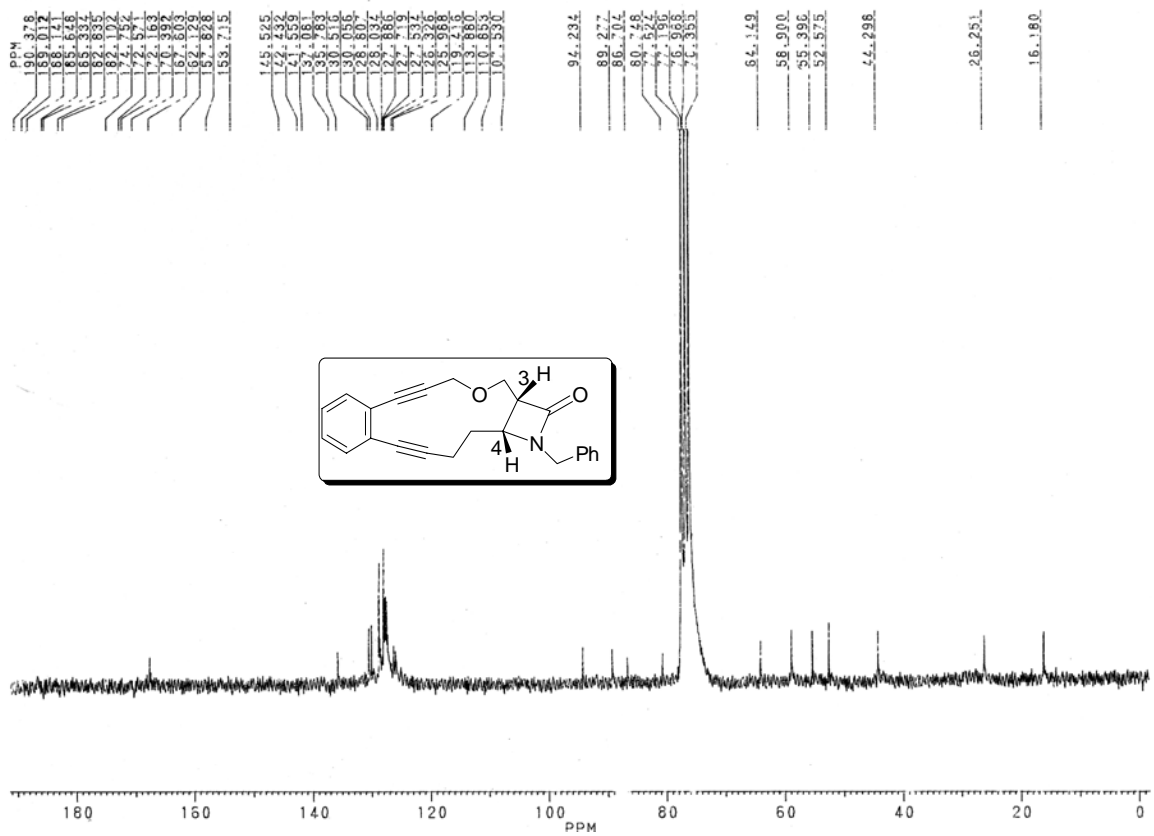

**Figure S25 & S26:  $^1\text{H}$  &  $^{13}\text{C}$  NMR Spectrum of compound 1 in  $\text{d}_6$ -acetone &  $\text{CDCl}_3$**

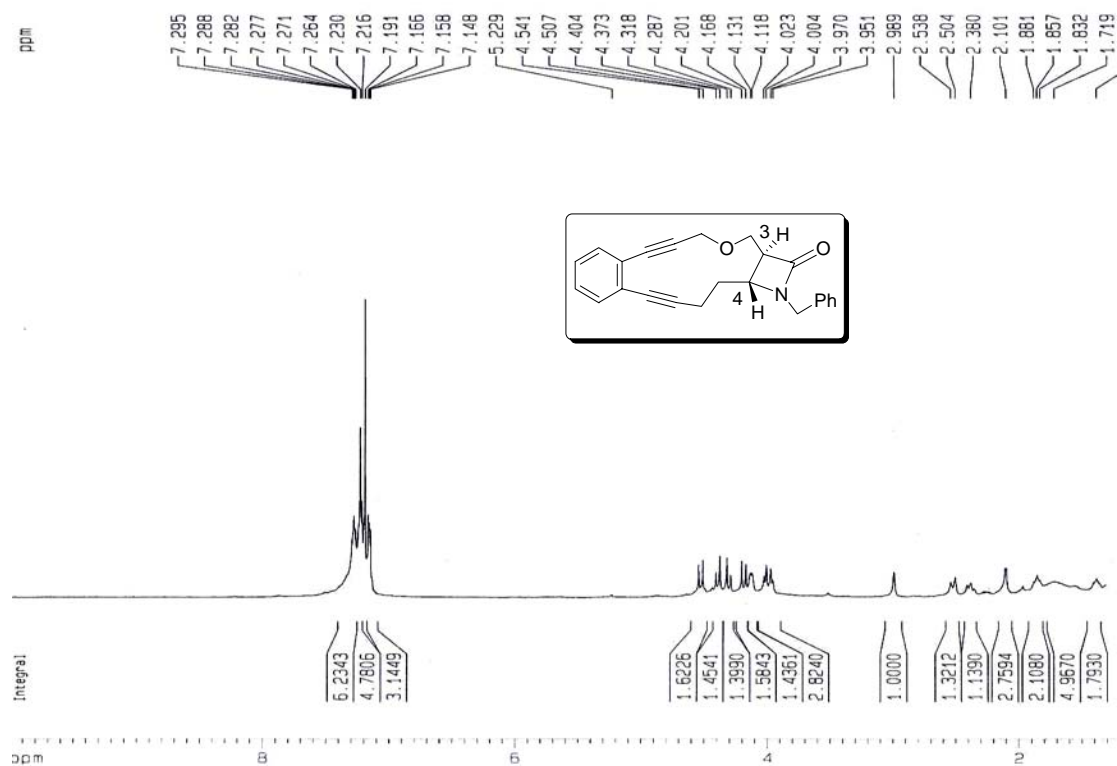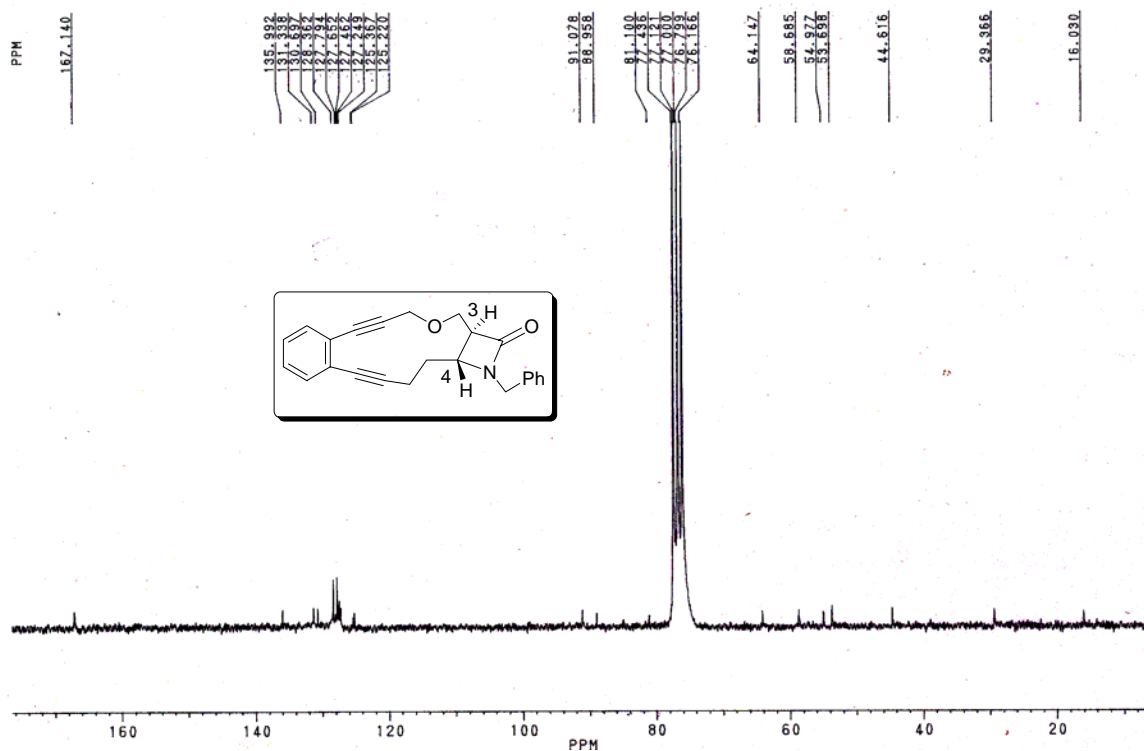

Figure S27 & S28: <sup>1</sup>H & <sup>13</sup>C NMR Spectrum of compound 2 in CDCl<sub>3</sub>

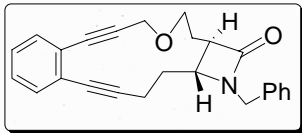

Chemical structure of compound 10 is shown in a box above the spectrum. The structure is a bicyclic compound with a benzene ring fused to a cyclohexene ring, which is further substituted with a phenyl group and a carbonyl group.

The  $^1\text{H}$  NMR spectrum (CDCl<sub>3</sub>) shows the following peaks and integration values:

- Aromatic region (7.5-7.2 ppm): Integration 9.9
- Aliphatic region (4.0-2.0 ppm): Integration 10.2, 11.5, 10.5, 16.6, 18.6, 9.5, 4.2, 7.6

**Figure S30:  $^1\text{H}$  NMR Spectrum of compound 3 in  $\text{CDCl}_3$**



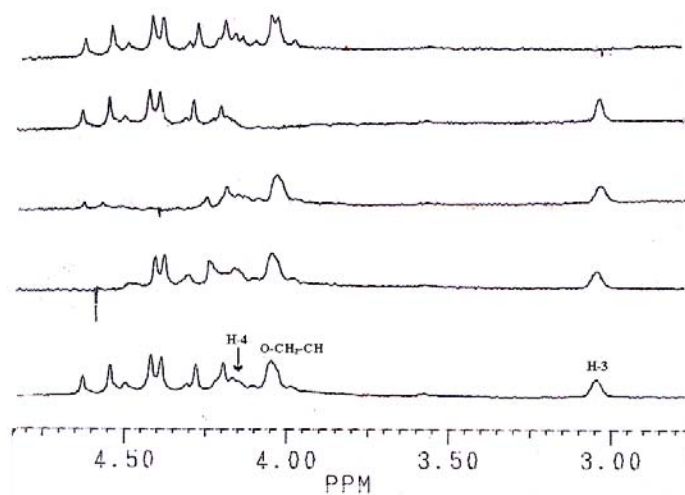

Figure S31: Decoupling experiments on Compound 2

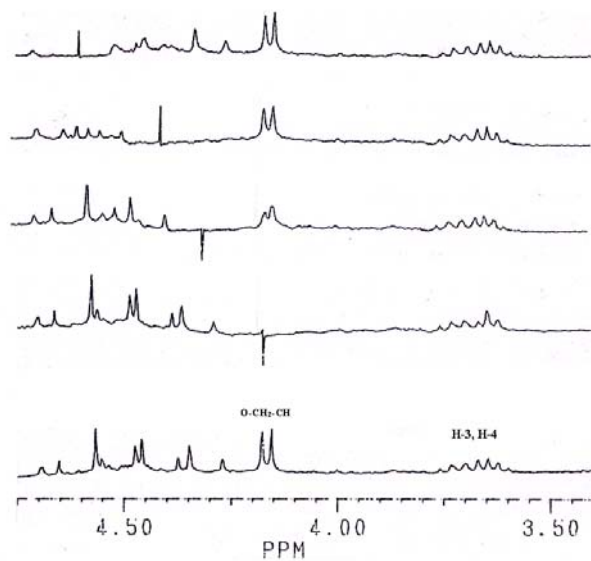

Figure S32: Decoupling experiments on Compound 1

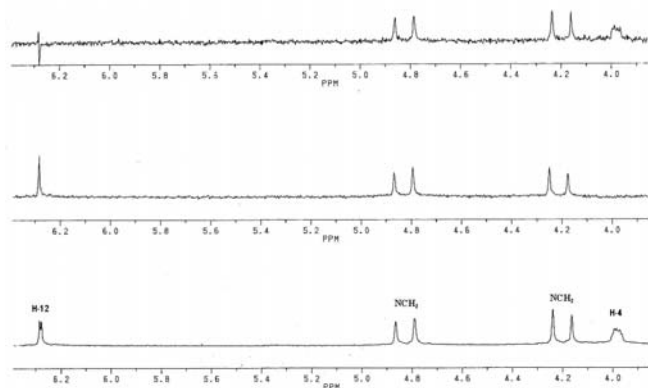

Figure S33: Decoupling experiments on Compound 6

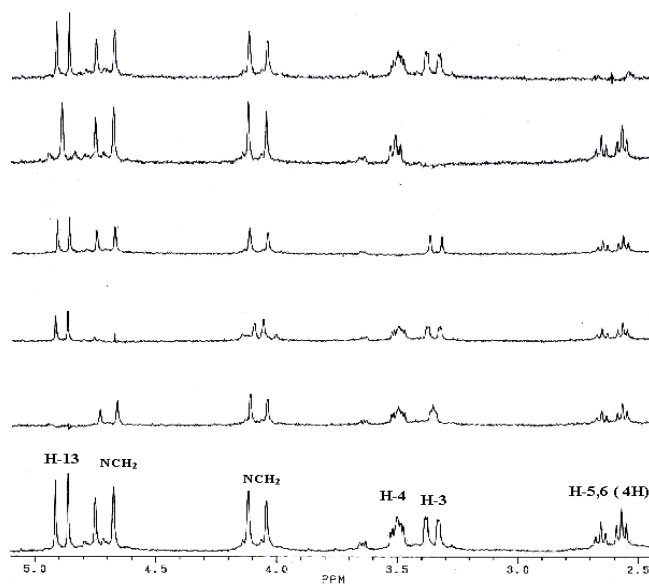

Figure S34: Decoupling experiments on Compound 5

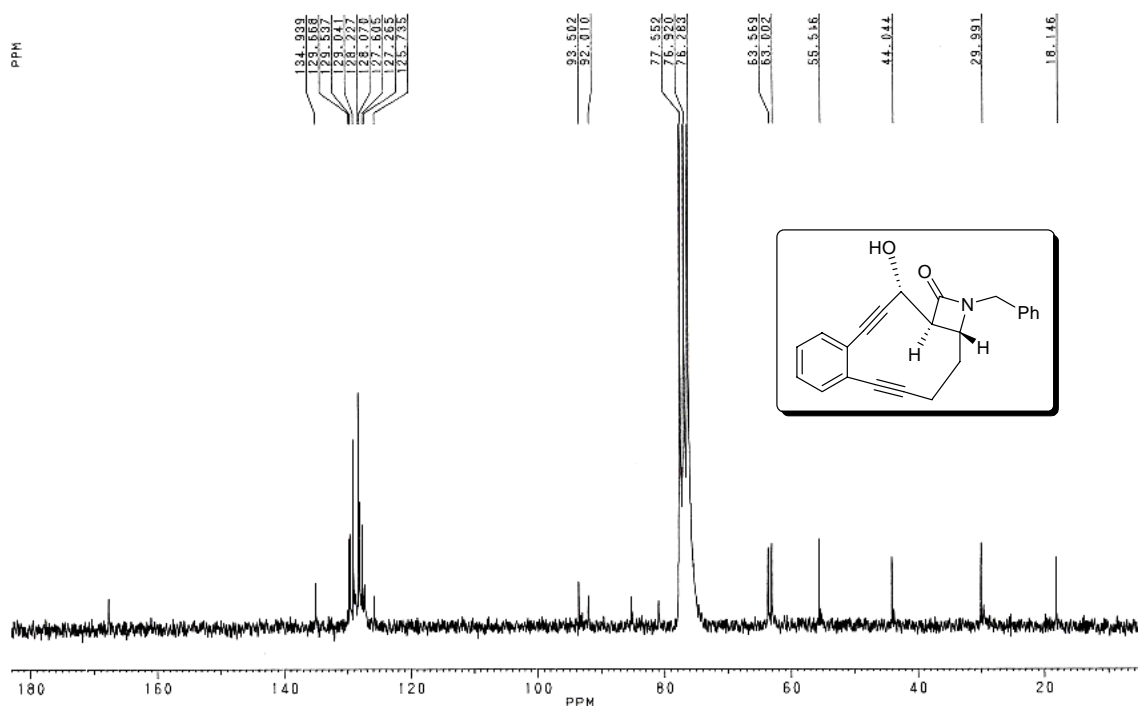

Figure S35:  $^{13}\text{C}$  NMR Spectrum of compound 5 in  $\text{CDCl}_3$

### Additional Spectral Data

For 2  $\delta_{\text{H}}$  7.38-7.12 (9H, m), 4.60, 4.25 (2H, ABq,  $J = 16.9$  Hz), 4.46, 4.36 (2H, ABq,  $J = 15.6$  Hz), 4.17-4.14 (1H, m), 4.07-4.03 (2H, m), 3.06-3.04 (1H, m), 2.58-2.43 (2H, m), 1.91-1.83 (2H, m);  $\delta_{\text{C}}$  167.1, 136.0, 131.3, 130.7, 128.4, 127.8, 127.7, 127.5, 127.3, 125.4, 125.2, 91.1, 89.0, 85.0, 81.1, 64.2, 58.7, 54.9, 53.7, 44.6, 29.4, 16.0; HRMS calcd for  $\text{C}_{24}\text{H}_{21}\text{NO}_2 + \text{H}^+$  356.1651 found 356.1642.

For 4  $\delta_{\text{H}}$  7.39-7.20 (9H, m), 4.46, 4.30 (2H, ABq,  $J = 15.3$  Hz), 4.44, 4.28 (2H, d,  $J = 16.3$  Hz), 4.17-4.05 (2H, m), 3.85-3.79 (1H, m), 3.55-3.50 (1H, m), 2.90-2.82 (1H, m), 2.53-1.90 (6H, m);  $\delta_{\text{C}}$  169.7, 136.5, 131.7, 131.2, 128.8, 128.7, 128.1, 127.6, 127.0, 126.4, 125.4, 93.0, 92.2, 88.7, 66.8, 58.4, 57.5, 52.7, 44.9, 31.0, 27.6, 16.3; HRMS calcd for  $\text{C}_{25}\text{H}_{23}\text{NO}_2 + \text{H}^+$  370.1808 found 370.1821.
